# Supplementary material
Source: MDPI journal article supplement (https://www.mdpi.com/2073-4395/10/7/920)
Supplement: s1 [file s1]

**Table S1.** The concentration of mineral element in different NSC.

| NSC               | Mineral nutrition (mg·L-1) |    |     |     |    |    |     |      |      |        |       |       |  |
|-------------------|----------------------------|----|-----|-----|----|----|-----|------|------|--------|-------|-------|--|
|                   | N                          | P  | K   | Ca  | Mg | S  | Fe  | B    | Mn   | Zn     | Cu    | Mo    |  |
| The full-strength | 210                        | 31 | 234 | 160 | 48 | 64 | 5.6 | 0.50 | 0.50 | 0.050  | 0.020 | 0.010 |  |
| 1/4               | 53                         | 8  | 59  | 40  | 12 | 16 | 1.4 | 0.13 | 0.13 | 0.0125 | 0.005 | 0.003 |  |
| 1/2               | 105                        | 16 | 117 | 80  | 24 | 32 | 2.8 | 0.25 | 0.25 | 0.025  | 0.010 | 0.005 |  |
| 3/4               | 158                        | 23 | 176 | 120 | 36 | 48 | 4.2 | 0.38 | 0.38 | 0.038  | 0.015 | 0.008 |  |

The ratio of NPK in NSC was 7:1:8.

**Table S2.** Two-way ANOVA analysis of nutritional quality accumulated under the interaction of photoperiod and NSC.

| Variable        | Photoperiod | NSC | Photoperiod interacted with NSC |
|-----------------|-------------|-----|---------------------------------|
| Soluble protein | **          | **  | **                              |
| Nitrate         | NS          | **  | *                               |
| Vitamin C       | **          | **  | NS                              |
| Soluble sugar   | **          | *   | NS                              |
| Free amino acid | **          | **  | **                              |

\* and \*\* indicated the significant difference at  $p \leq 0.01$  and  $p \leq 0.05$ , respectively. NS = no significance. Significant differences in the treatments were performed by SPSS 17.0 for ANOVA. The two-way ANOVA was carried out the interactive type.

**Table S3.** Two-way ANOVA analysis of mineral element accumulated under the interaction of photoperiod and NSC.

| Variable (Total) | Photoperiod | NSC | Photoperiod interacted with NSC |
|------------------|-------------|-----|---------------------------------|
| N                | **          | **  | **                              |
| P                | **          | **  | **                              |
| K                | **          | **  | **                              |
| Ca               | **          | **  | **                              |
| Mg               | **          | **  | **                              |
| Zn               | **          | **  | **                              |

\* and \*\* indicated the significant difference at  $p \leq 0.05$  and  $p \leq 0.01$ , respectively. NS = no significance. Significant differences in the treatments were performed by SPSS 17.0 for ANOVA. The two-way ANOVA was carried out the interactive type.

**Table S4.** Two-way ANOVA analysis of antioxidant component accumulated under the interaction of photoperiod and NSC.

| Variable    | Photoperiod | NSC | Photoperiod interacted with NSC |
|-------------|-------------|-----|---------------------------------|
| Anthocyanin | **          | **  | **                              |
| Polyphenol  | **          | NS  | **                              |
| Flavonoid   | **          | *   | **                              |
| FRAP        | **          | *   | **                              |
| DPPH        | **          | **  | **                              |

\* and \*\* indicated the significant difference at  $p \leq 0.05$  and  $p \leq 0.01$ , respectively. NS = no significance. Significant differences in the treatments were performed by SPSS 17.0 for ANOVA. The two-way ANOVA was carried out the interactive type.

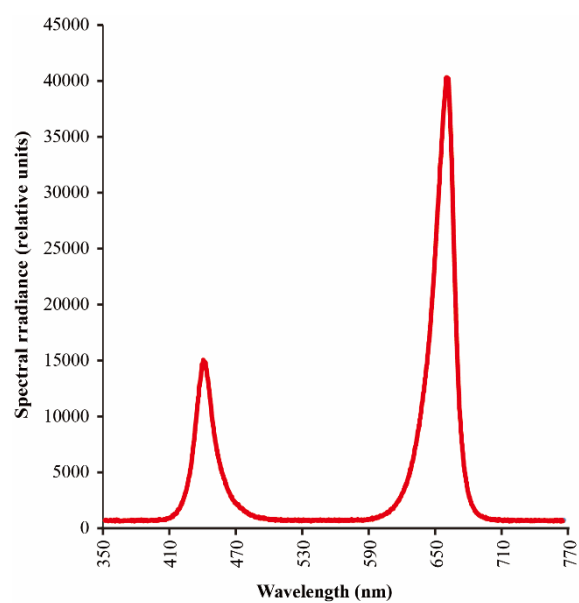

**Fig. S1.** The Spectral distributions of LEDs in this study.

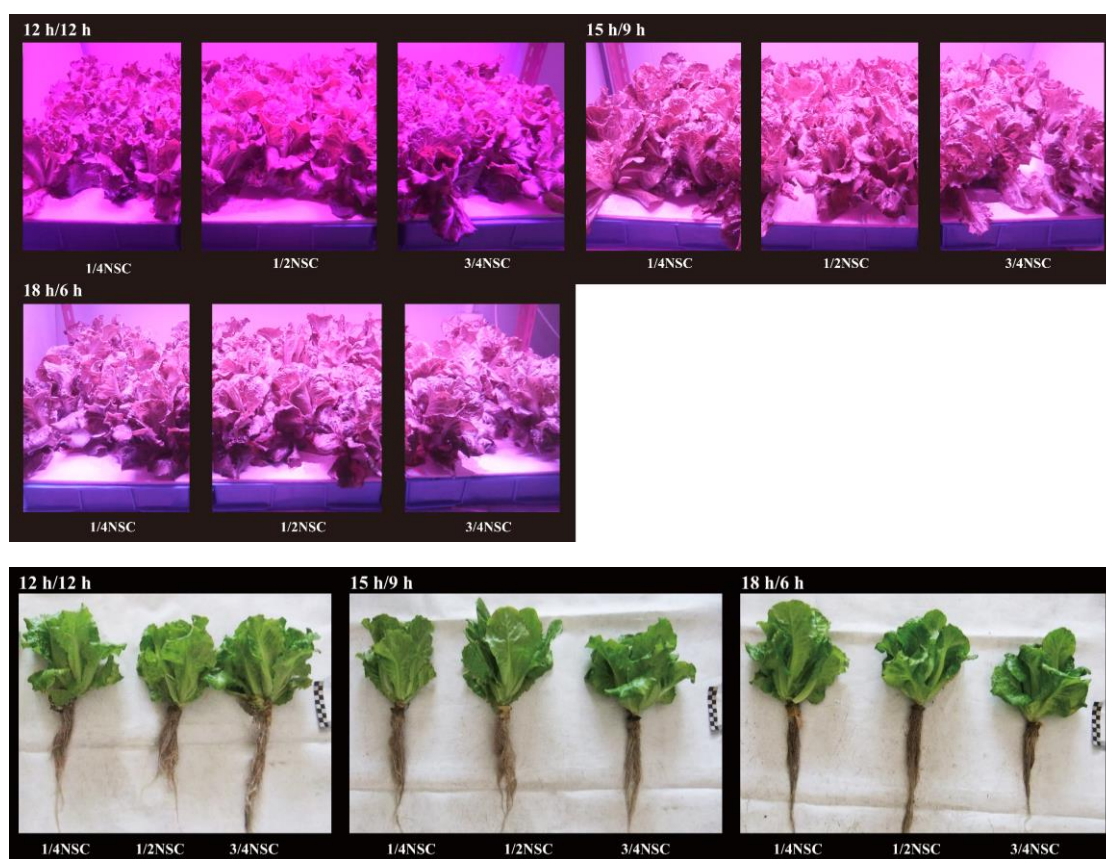

**Fig. S2.** The phenotype of lettuce plant under the interaction of photoperiod and NSC.
